# Supplementary material for: Supramolecular organic–inorganic domains integrating fullerene-based acceptors with polyoxometalate-bis-pyrene tweezers for organic photovoltaic applications
Source: Royal Society of Chemistry journal article supplement (doi:10.1039/d1tc03148a), 2021-01-01
Supplement: d1tc03148a1.pdf [file d1tc03148a1.pdf]

SUPPLEMENTARY INFORMATION

**Supramolecular Organic-Inorganic Domains integrating Fullerene-based acceptors with Polyoxometalate-bis-Pyrene Tweezers for Organic Photovoltaic applications.**

Gabriele Giancane,<sup>a,b</sup> Simona Bettini,<sup>b,c</sup> Ludovico Valli,<sup>b,c</sup> Victoria Bracamonte,<sup>d,e</sup> Mauro Carraro,<sup>f</sup> Marcella Bonchio<sup>f</sup> and Maurizio Prato<sup>g,h,i,\*</sup>

<sup>a</sup> Department of Cultural Heritage, University of Salento, Via D. Birago, 73100, Lecce, Italy

<sup>b</sup> Consorzio Interuniversitario Nazionale per la Scienza e Tecnologia dei Materiali, INSTM, Via G. Giusti, 9, I-50121 Firenze, Italy

<sup>c</sup> Department of Biological and Environmental Sciences and Technologies, DISTEBA, University of Salento, Via per Arnesano, 73100 Lecce, Italy

<sup>d</sup> Universidad Nacional de Córdoba. Facultad de Matemática, Astronomía, Física y Computación, Córdoba, Argentina

<sup>e</sup> CONICET, Instituto de Física Enrique Gaviola (IFEG), Córdoba, Argentina

<sup>f</sup> CNR-ITM and Dipartimento di Scienze Chimiche, University of Padova, Padova, Italy

<sup>g</sup> Department of Chemical and Pharmaceutical Sciences, University of Trieste, via L. Giorgieri 1, Trieste I-34127, Italy

<sup>h</sup> Center for Cooperative Research in Biomaterials (CIC biomaGUNE) Basque Research and Technology Alliance (BRTA), Paseo de Miramón 182, Donostia San Sebastián E-20014, Spain

<sup>i</sup> Basque Foundation for Science, Ikerbasque, Bilbao E-48013, Spain.

\*Correspondence to [prato@units.it](mailto:prato@units.it)

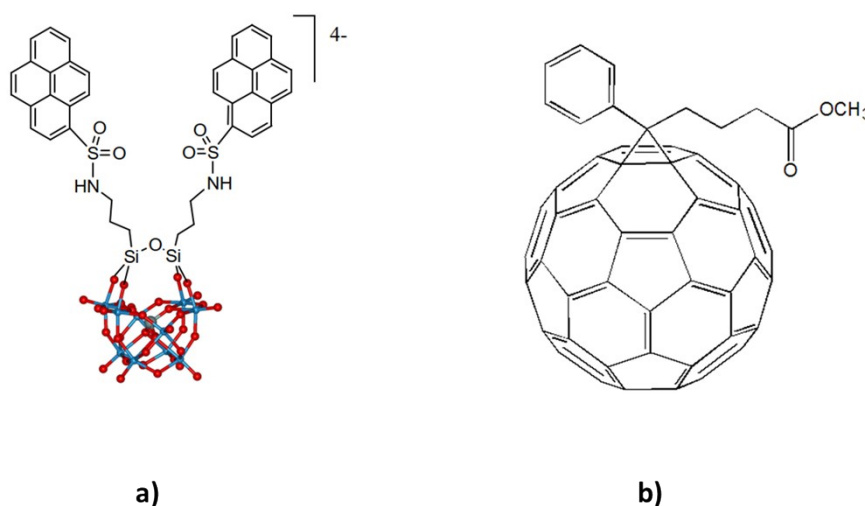

Figure 1S. Chemical structure of a) divacant Keggin-type decatungstosilicate bisfunctionalized with pyrene and b) Phenyl-C61-butyric acid methyl ester (PCBM) used to form the supramolecular adduct.

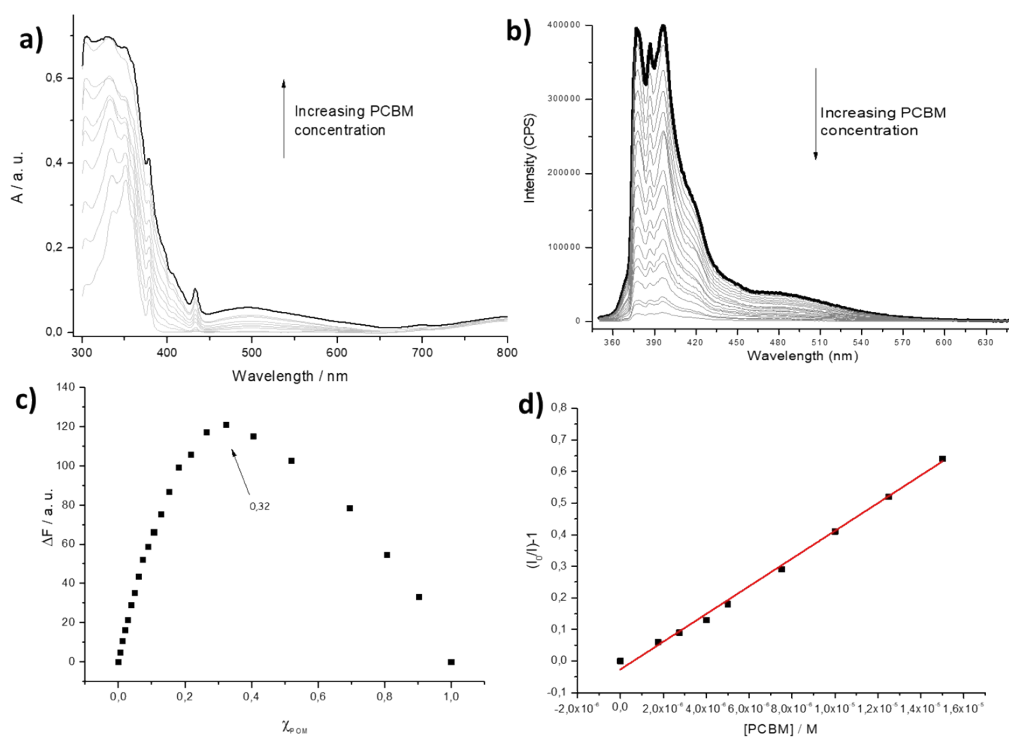

Figure 2S. Influence of PCBM (dissolved in o-DCB,  $5 \times 10^{-3}$  M) added 4  $\mu$ L at each step on a) absorption and b) fluorescence spectra of pyrPOM (10  $\mu$ M in DMF) solution. c) Job's plot for pyrPOM and PCBM in DMF/o-DCB at room temperature. d) Fluorimetric Stern–Volmer graph ( $\lambda_{ex} = 350$  nm;  $\lambda_{em} = 397$  nm) .

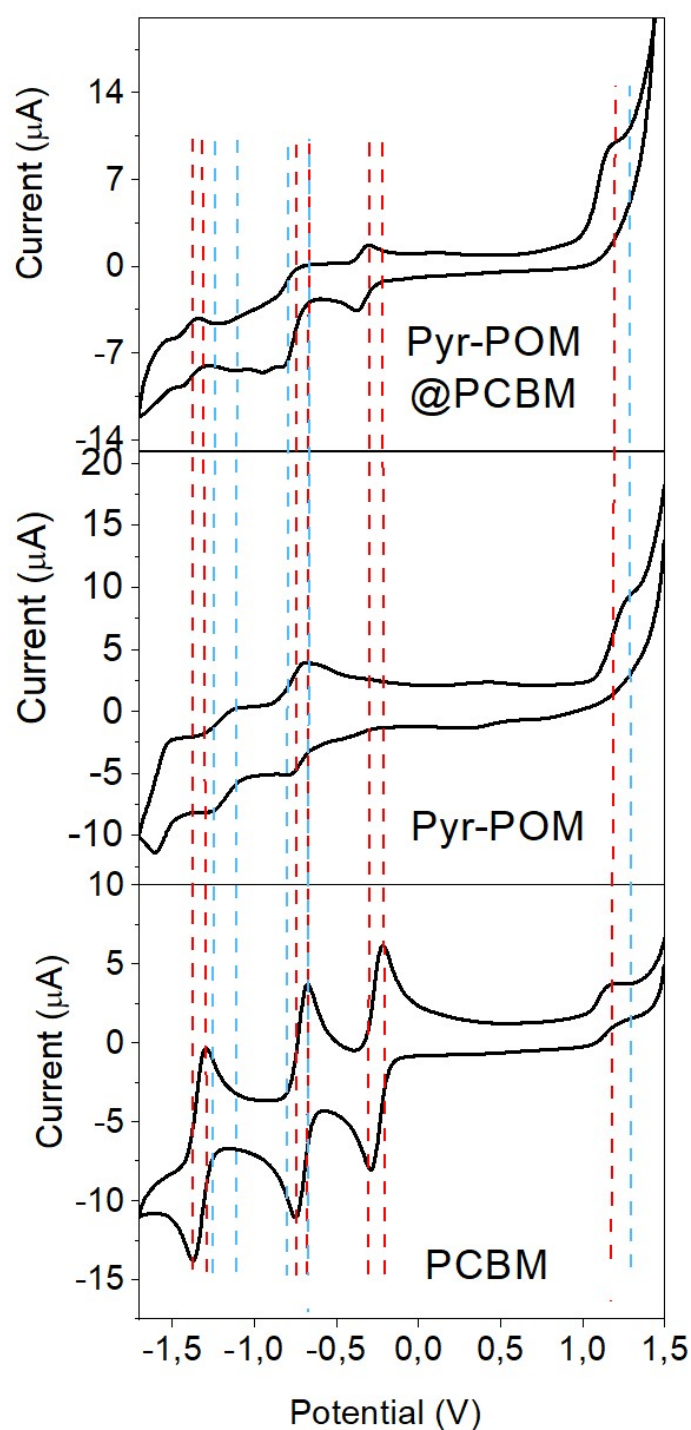

Figure S3. Cyclic voltammograms of pyrPOM@PCBM (1:2) (pyrPOM 0.5 mM), compared with those of pyrPOM (0.5 mM) and PCBM (1 mM) in degassed DMF solution containing TBAP 0.10 M, at a scan rate of 50  $\text{mV s}^{-1}$ . While the irreversible oxidation wave of pyrPOM@PCBM (with anodic peak potential  $E_{\text{pa}} = +1.19 \text{ V}$  vs  $\text{Ag}/\text{Ag}^+$ ) appears as the overlap of POM-linked pyrene band ( $E_{\text{pa}} = +1.27 \text{ V}$  vs  $\text{Ag}/\text{Ag}^+$ ) and PCBM oxidation band ( $E_{\text{pa}} = +1.18 \text{ V}$  vs  $\text{Ag}/\text{Ag}^+$ ), the reduction waves of the two building blocks are strongly modified upon assembly of the two components: the characteristic pattern given by the three reversible reduction bands of PCBM (red dashed lines, with half-wave potentials  $E_{1/2} = -0.246$ ;  $-0.709$ ;  $-1.330 \text{ V}$  vs.  $\text{Ag}/\text{Ag}^+$ ) become much

less defined, being the first reduction band of PCMB shifted towards more negative potentials ( $E_{1/2} = -0.336$  V vs Ag/Ag<sup>+</sup>) and the other bands mixed with those of pyrPOM (light blue dashed lines).

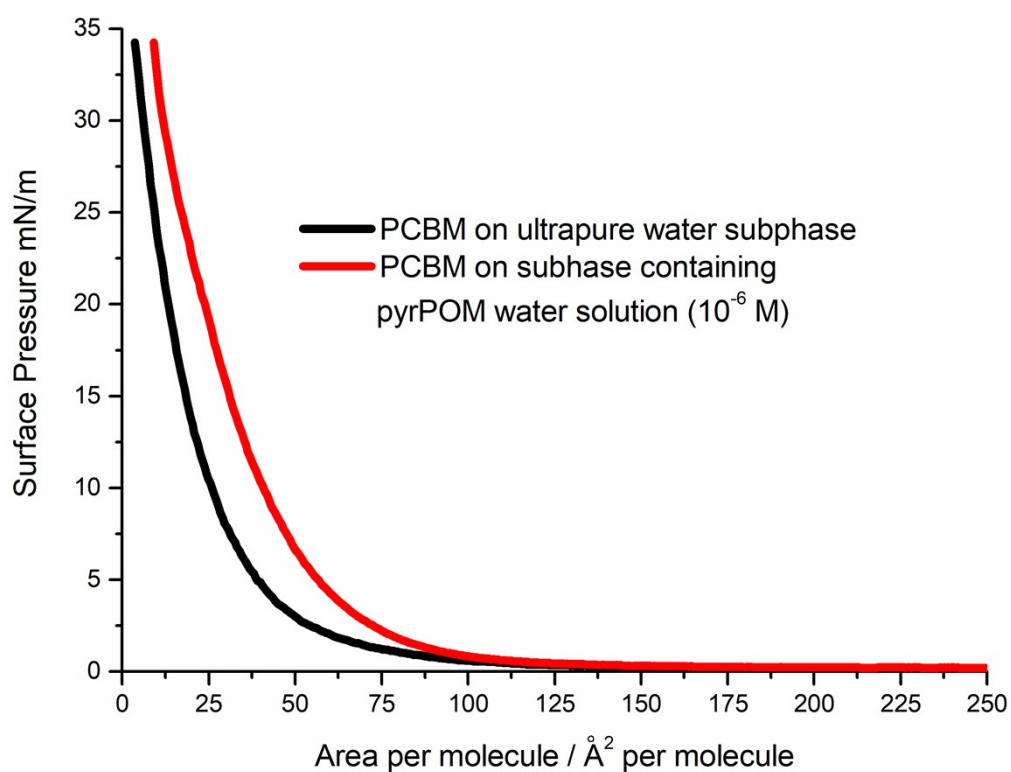

Figure 4S. Langmuir curves surface pressure vs area per molecule recorded for PCBM chloroform solution ( $10^{-3}$  M) spread on ultrapure water subphase (black line) and for PCBM chloroform solution ( $10^{-3}$  M) spread on subphase containing pyrPOM solution ( $10^{-6}$  M). An evident shift towards higher area per molecule values is observed when pyrPOM is dissolved in the subphase.

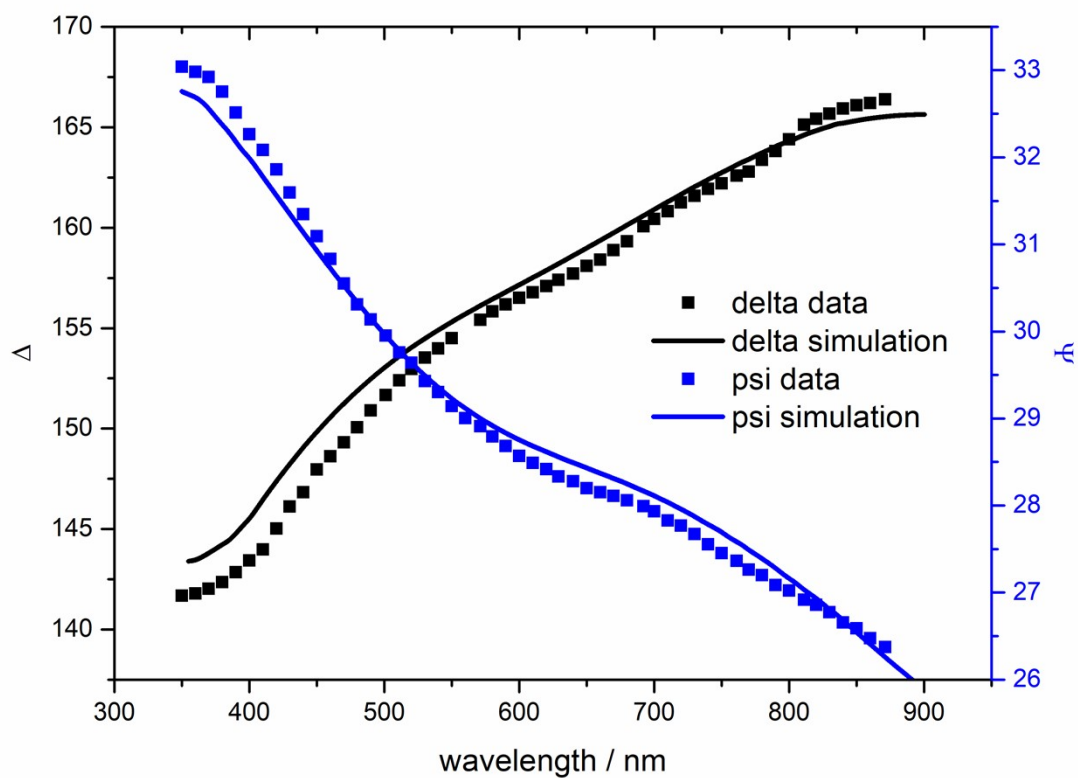

Figure 5S. Squared points represent the optical functions  $\Delta$  and  $\psi$  of PCBM LS film (8 runs), continuous lines are the simulated curves obtained using two Lorentz oscillators as model. It was estimated that the thickness of 8 PCBM LS runs is  $48.1 \pm 6.3$  nm.

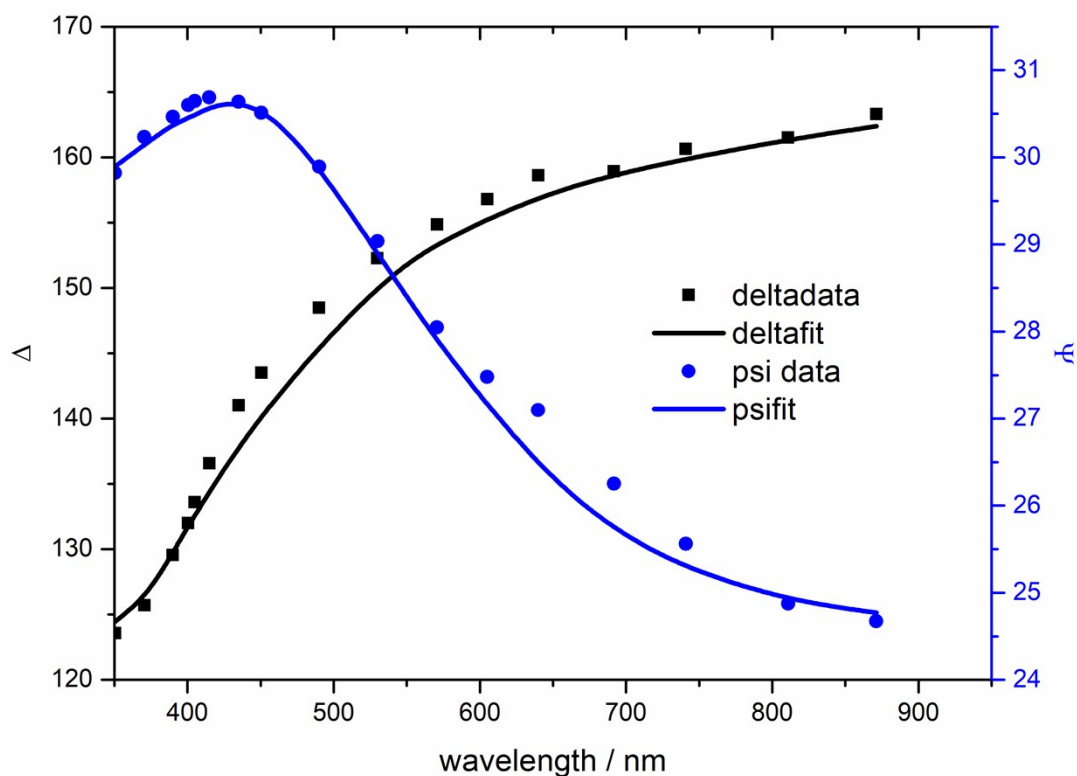

Figure 6S. Squared points represent the optical functions  $\Delta$  and  $\psi$  of pyrPOM@PCBM LS film (8 runs), continuous lines are the simulated curves obtained using two Lorentz oscillators and a Drude equation as model. It was estimated that the thickness of 8 PCBM LS runs is  $59.7 \pm 3.7$  nm

In order to evaluate the **molar ratio** between pyrPOM and PCBM, two different EMAs (Effective Medium Approximations) have been used:

Maxwell-Garnett's approximation:

$$\varepsilon_{eff} = \varepsilon_m \frac{2(1 - \delta_i)\varepsilon_m + (1 + 2\delta_i)\varepsilon_i}{(2 + \delta_i)\varepsilon_m + (1 - \delta_i)\varepsilon_i}$$

| Parameter                 | Best fit    | +/-         | unit         |
|---------------------------|-------------|-------------|--------------|
| thickness                 | 67,1        | 5,4         | nm           |
| <b>fraction<br/>guest</b> | <b>0,29</b> | <b>0,02</b> | <b>ratio</b> |
| RMSE                      | 3,623       |             |              |

PCBM:POM = 2,4:1

$$\delta_{POM} \frac{\varepsilon_{POM} - \varepsilon_{eff}}{\varepsilon_{POM} + (d-1)\varepsilon_{eff}} + \delta_{PCBM} \frac{\varepsilon_{PCBM} - \varepsilon_{eff}}{\varepsilon_{PCBM} + (d-1)\varepsilon_{eff}} = 0$$

Bruggeman's approximation:

| Parameter                 | Best fit    | +/-         | unit         |
|---------------------------|-------------|-------------|--------------|
| thickness                 | 70,4        | 4,1         | nm           |
| <b>fraction<br/>guest</b> | <b>0,32</b> | <b>0,02</b> | <b>ratio</b> |
| RMSE                      | 2,985       |             |              |

PCBM:POM = 2,1:1

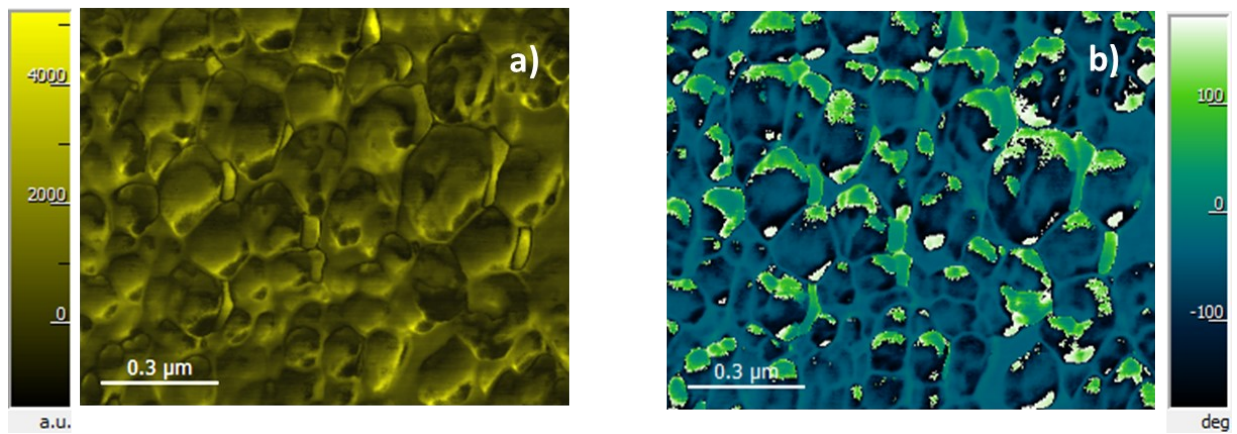

Figure 7S: PFM amplitude a) and phase b) of two LS runs of pyrPOM@PCBM film.
